# Supplementary material for: The Tomato Genome Encodes SPCH, MUTE, and FAMA Candidates That Can Replace the Endogenous Functions of Their Arabidopsis Orthologs
Source: Front Plant Sci. 2019 Oct 29;10:1300. doi: 10.3389/fpls.2019.01300 (PMC6828996; doi:10.3389/fpls.2019.01300)
Supplement: Supplementary file 1 [file DataSheet_1.zip]

Archive with 6 entries (6 files):
- Supplementary Figure 1.docx
- Supplementary Figure 2.docx
- Supplementary Figure 3.docx
- Supplementary Figure 4.docx
- Supplementary Figure 5.pdf
- Supplementary Tables 1-6.pdf
