# Supplementary material for: The Tomato Genome Encodes SPCH, MUTE, and FAMA Candidates That Can Replace the Endogenous Functions of Their Arabidopsis Orthologs
Source: Front Plant Sci. 2019 Oct 29;10:1300. doi: 10.3389/fpls.2019.01300 (PMC6828996; doi:10.3389/fpls.2019.01300)
Supplement: Supplementary file 1 [file DataSheet_1.zip › Supplementary Tables 1-6.pdf]

**Supplementary Table 1. Primers used for amplification of tomato cDNAs**

| <b><u>Gene</u></b> | <b><u>ID Gene</u></b> | <b><u>Forward primer</u></b> | <b><u>Reverse primer</u></b>    | <b><u>Size<br/>(bp)</u></b> |
|--------------------|-----------------------|------------------------------|---------------------------------|-----------------------------|
| <i>Actin-41</i>    | NP_001317048          | TGGCATCATACTTTCTACAATG       | CTAATATCCACGTCACATTTTCAT        | 615                         |
| <i>SPCH</i>        | Solyc03g007410        | ATGGATGGTGACCAAAATTTATCT     | TTAGCAGAATGTCTGCTGAATC          | 1005                        |
| <i>MUTE</i>        | Solyc01g080050        | ATGTCTCACATAGCAGTGGA         | CTATATCTCGTTGATACATAAAACATCAG   | 588                         |
| <i>FAMA</i>        | Solyc05g053660        | ATGGAGAAAGAAGAAAATTGCC       | CTAGTTGATATCATATGGGGCTA         | 1152                        |
| <i>FAMA-like</i>   | Solyc09g091760        | ATGGTTAATATTGATGAAGAAAAGGC   | CTATTTGCATGAAAAAAAAACTGAATATTTG | 744                         |

**Supplementary Table 2. Summary of the constructs generated in this work**

| <i>Promoter</i>          | <i>Coding region</i> | <i>Destination Vector</i> |
|--------------------------|----------------------|---------------------------|
| <i>AtSPCH</i>            | SolycSPCH            | <i>pK7m24GW</i>           |
| <i>AtSPCH</i>            | SolycSPCH:GFP        | <i>pK7m34GW</i>           |
| <i>pG10-90</i>           | SolycSPCH            | <i>pER8GW</i>             |
| <i>AtMUTE</i>            | SolycMUTE            | <i>pK7m24GW</i>           |
| <i>AtMUTE</i>            | SolycMUTE:GFP        | <i>pK7m34GW</i>           |
| <i>pG10-90</i>           | SolycMUTE            | <i>pER8GW</i>             |
| <i>AtFAMA</i>            | SolycFAMA            | <i>pH7m24GW</i>           |
| <i>AtFAMA</i>            | SolycFAMA:GFP        | <i>pH7m34GW</i>           |
| <i>pG10-90</i>           | SolycFAMA            | <i>pER8GW</i>             |
| <i>AtFAMA</i>            | SolycFAMA-like       | <i>pH7m24GW</i>           |
| <i>AtFAMA</i>            | SolycFAMA-like:GFP   | <i>pH7m34GW</i>           |
| <i>pG10-90</i>           | SolycFAMA-like       | <i>pER8GW</i>             |
| <i>SolycSPCHpro</i>      | GFP                  | <i>pGWB404</i>            |
| <i>SolycMUTEpro</i>      | GFP                  | <i>pGWB404</i>            |
| <i>SolycFAMApr</i>       | GFP                  | <i>pGWB404</i>            |
| <i>SolycFAMA-likepro</i> | GFP                  | <i>pGWB404</i>            |

**Supplementary Table 3. Primers used for genotyping**

| <b><u>Primer</u></b> | <b><u>Sequence 5'-3'</u></b> | <b><u>Allele identified</u></b>                           |
|----------------------|------------------------------|-----------------------------------------------------------|
| <i>spch-3</i> _RP    | CACTACCCATTTCTTCC            | <i>SPCH</i> and <i>spch-3</i>                             |
| <i>spch-3</i> _LP    | GAAAAACCTAGATCCTCCCCC        | <i>SPCH</i>                                               |
| SAIL_LB              | TTCATAACCAATCTCGATACAC       | <i>spch-3</i>                                             |
| <i>fama-1</i> _RP    | CAATACAAAAAGCTCCCCTCAC       | <i>FAMA</i> and <i>fama-1</i>                             |
| <i>fama-1</i> _LP    | TCATTCAATTTGCTTCCTACGG       | <i>FAMA</i>                                               |
| LbB1                 | GCGTGGACCGCTTGCTGCAAC        | <i>fama-1</i>                                             |
| <i>mute-3</i> _RP    | CTATAACACCAAATTCCATC         | <i>MUTE</i> and <i>mute-3</i> after <i>HphI</i> digestion |
| <i>mute-3</i> _LP    | CTAATGTTGTATTGAGAGTTG        | <i>MUTE</i> and <i>mute-3</i> after <i>HphI</i> digestion |

**Supplementary Table 4. Primers used for qPCR**

| <b><u>Gene</u></b>      | <b><u>Forward primer</u></b> | <b><u>Reverse primer</u></b> |
|-------------------------|------------------------------|------------------------------|
| <i>Actin-2</i>          | TCTTCCGCTCTTTCTTTCCAAGC      | ACCATTGTCACACACGATTGGTTG     |
| <i>Polyubiquitin-10</i> | CACACTCCACTTGGTCTTGCGT       | TGGTCTTTCCGGTGAGAGTCTT       |
| <i>SPCH</i>             | GCTGCTCTTGAAGATTTGGCTCT      | TTCTGCACTTAGTTGGCACTCAAT     |
| <i>TMM</i>              | GATTGTGTGATGCAGAAACGTC       | TCTTCTTCTCATGATAGGTGCTGGA    |
| <i>MUTE</i>             | GCTATCTTTTCAAGTTCTTCACCTC    | CACTCCAATCCTATCTTAACAACG     |
| <i>FAMA</i>             | TCAAGATAACAACGAAACGAGGT      | AATATCTGTTGGATGGAACCTGC      |
| <i>GFP</i>              | AAGCAGCAAGACTTCTTCAAGTC      | TCGCCCTCGAACTTCACCTC         |
| <i>KAT-1</i>            | ACAACAAGTTGCCATAAAGGT        | AAGGTGACAAAGCAACAC           |

**Supplementary Table 5. List of selected transgenic lines homozygous for the mutant alleles at the corresponding genomic loci.**

| <b><u>Construct</u></b>     | <b><u>Genotype</u></b>           | <b><u>Transgenic lines</u></b> |
|-----------------------------|----------------------------------|--------------------------------|
| AtpSPCH::SolycSPCH:GFP      | Homozygous (-/-) <i>spch-3</i>   | 1; 8; 5.5; 5.7; 15.6; 37.12    |
| AtpMUTE::SolycMUTE:GFP      | Homozygous (-/-) <i>mute-3</i>   | 3; 13; 14; 20; 25              |
| AtpFAMA::SolycFAMA:GFP      | Homozygous (-/-) <i>fama-1</i>   | 35; 37; 38; 48                 |
| AtpFAMA::SolycFAMA-like:GFP | Heterozygous (+/-) <i>fama-1</i> | 1;1.1; 2; 2.2; 3               |

**Supplementary Table 6. Classification of stomatal lineages in developing tomato cotyledons**

| <b>Number of<br/>assymetric<br/>divisions</b> | <b>Number of lineages<br/>(48h darkness)*</b> | <b>%</b> | <b>Number of lineages<br/>(96h darkness)**</b> | <b>%</b> |
|-----------------------------------------------|-----------------------------------------------|----------|------------------------------------------------|----------|
| <b>1</b>                                      | 28                                            | 56       | 5                                              | 12       |
| <b>2</b>                                      | 22                                            | 44       | 27                                             | 66       |
| <b>3</b>                                      | -                                             | -        | 9                                              | 22       |

\* N= 50

\*\* N= 50
